# Supplementary material for: Central precocious puberty risk prediction model for Chinese children: a cross-sectional study
Source: Research Square preprint supplement (doi:10.21203/rs.3.rs-1334243/v1), 2022-02-28
Supplement: Supplementary file 2 [file e7f712945b60717d55c250ed.xlsx]

## Sheet: Sheet1
Number	Group	Gender	Age(y)	Height(cm)	Body weight(kg)	BMI(kg/m2)	Bone age(y)	LH(IU/L)	FSH(IU/L)	Testosterone(ng/dL)	Estradiol(pmol/L)	Family history of CPP	Residence	Only child	Left-behind children	Using adult skin careproducts	Watching love cartoon	Time for electronic devices	Sleep duration	Out door exercise duration	Sweet tooth	High protein foods lover	Fried foods lover	Carbonated beverage intake	Milk intake	Career of mother	Career of father
1	1	2	6	120	35	15.23	6	5.58	16.58	2.51	36.18	1	2	2	1	1	1	2	2	2	2	2	2	1	1	2	1
2	1	2	8	132	45	14.64	9	6.74	17.36	2.66	25.4	1	2	2	1	1	1	2	2	2	2	2	2	1	1	3	3
3	1	2	9	145	32	16.06	10	6.43	18.96	2.69	36.58	1	2	2	2	1	1	2	2	2	2	2	1	1	1	1	3
4	1	2	7	135	39	15.7	8	6.58	19.25	3.16	34.26	1	2	2	2	1	1	2	2	2	2	2	2	1	1	1	3
5	1	2	8	140	36	14.67	9	7.25	15.45	3.65	46.03	1	1	1	1	1	1	2	2	2	2	2	2	1	1	3	1
9	1	2	6	126	27	15.51	6	4.35	16.39	3.12	39.24	1	2	2	1	2	2	2	2	2	2	2	1	1	2	2	1
13	1	2	7	120	39	15.38	8	3.54	20.36	2.64	37.26	2	2	2	1	1	2	2	2	2	2	2	1	1	2	1	1
17	1	2	7	135	28	15.66	8	7.07	15.36	3.83	23.15	1	1	1	2	1	2	2	2	2	2	2	1	1	2	3	3
21	1	2	7	120	32	15.52	8	5.63	15.92	3.28	32.92	1	2	2	2	1	2	2	2	2	2	2	1	1	2	1	1
25	1	2	9	135	38	17.15	10	5.79	14.83	2.28	28.93	1	1	1	1	1	2	2	2	2	2	2	1	2	2	2	2
29	1	2	9	135	45	16.19	10	4.14	15.73	3.47	34.41	1	1	2	2	1	2	2	2	2	2	2	1	2	2	3	1
33	1	2	8	123	29	15.27	9	5.98	19.55	2.92	25.23	1	1	2	2	1	2	2	2	2	2	2	1	2	2	1	2
37	1	2	8	140	35	14.16	9	2.79	14.75	2.51	42.48	1	1	1	1	1	2	2	2	2	2	2	1	2	2	2	1
41	1	2	6	120	36	16.3	6	1.89	16.9	3.65	36.37	1	2	2	1	1	2	2	2	2	2	2	1	2	2	3	1
45	1	2	6	135	27	15.11	6	6.57	15.81	3.12	34.58	1	1	1	2	1	2	2	2	2	2	2	2	2	2	2	1
49	1	2	7	135	39	17.7	8	3.06	16.71	2.64	21.89	1	2	1	2	1	2	2	2	2	2	2	1	2	2	1	1
51	1	2	8	120	29	16.44	9	4.16	15.65	2.82	45.36	2	1	2	2	1	2	2	2	2	2	1	1	2	2	2	2
53	0	2	6	120	23	17.39	6	0.58	1.59	0.12	20.25	1	1	1	1	1	2	2	2	2	1	2	1	1	2	3	2
86	0	2	8	120	26	17.06	8	1.46	2.57	2.92	25.31	1	2	2	1	1	1	2	2	2	1	2	1	1	2	2	2
87	0	2	9	160	21	15.2	9	2.18	3.98	1.28	24.96	1	1	2	1	1	1	2	2	2	1	2	1	1	2	2	2
88	0	2	7	115	30	14.88	7	2.29	4.63	0.95	17.65	1	1	2	1	1	1	2	2	2	1	2	1	1	2	3	2
89	0	2	6	130	28	16.57	6	2.04	1.86	2.75	19.44	1	1	2	1	1	1	2	2	2	1	2	1	1	2	2	1
90	0	2	8	115	25	16.9	8	1.83	1.69	2.51	17.63	1	2	2	1	1	1	2	2	2	1	2	1	1	2	2	2
91	0	2	9	130	26	15.38	9	1.64	1.65	2.66	11.87	1	2	2	1	1	1	2	2	2	1	2	1	1	2	2	2
92	0	2	7	110	22	15.18	7	1.77	2.03	2.69	14.36	1	2	2	1	1	1	2	2	2	1	2	1	1	2	2	2
93	0	2	7	126	23	14.49	7	1.89	2.36	3.16	22.64	1	1	2	1	1	1	2	2	2	1	2	1	1	2	2	2
94	0	2	6	135	25	15.92	6	2.31	1.32	3.65	25.41	1	1	1	2	1	1	2	2	2	1	2	1	1	2	2	2
95	0	2	8	135	24	15.37	8	2.38	1.24	3.92	17.63	1	1	1	2	1	1	2	2	2	1	2	1	1	2	3	2
96	0	2	9	140	26	15.47	9	3.08	5.03	2.56	17.59	1	2	1	2	1	1	2	2	2	1	2	1	1	2	2	1
97	0	2	7	120	21	14.58	7	2.89	1.16	2.25	18.48	1	2	1	2	1	1	2	2	2	1	2	1	1	2	2	2
98	0	2	6	120	30	15.83	6	0.75	1.05	3.12	24.3	1	2	1	2	1	1	2	2	2	1	2	1	1	2	2	2
99	0	2	8	160	28	14.94	8	1.2	1.93	1.56	23.96	1	1	1	2	1	1	2	2	2	1	2	1	1	2	2	2
100	0	2	9	115	25	16.9	9	1.08	0.69	1.25	16.94	1	2	2	2	1	1	2	2	2	1	2	1	1	2	2	2
101	0	1	10	130	26	15.38	10	1.24	0.58	2.96	23.52	1	1	2	1	1	1	2	2	2	1	2	1	1	2	2	2
102	0	2	7	115	22	16.64	7	1	0.69	2.64	21.33	1	1	2	1	1	1	2	2	2	1	2	1	1	2	3	2
103	0	2	6	130	23	15.81	6	1.08	1.86	2.79	14.36	1	1	2	1	1	1	2	2	2	1	2	1	1	2	2	1
104	0	2	8	110	25	16.66	8	0.96	1.69	2.82	17.38	1	2	2	1	1	1	2	2	1	1	2	1	1	2	2	2
105	0	1	9	126	24	15.12	9	1.44	1.65	3.32	27.39	1	2	1	1	1	1	2	2	1	1	2	1	1	2	2	2
106	0	2	7	135	26	14.27	7	1.51	2.03	0.12	30.75	1	2	1	1	1	1	2	2	1	1	2	1	1	2	2	2
107	0	2	6	135	21	15.52	6	1.35	2.36	0.25	21.33	1	1	1	1	1	1	2	2	1	1	2	1	1	2	2	2
108	0	2	8	140	30	15.31	8	1.21	1.32	0.65	21.28	1	1	1	1	1	1	2	2	1	1	2	1	1	2	2	2
109	0	2	9	120	28	17.44	9	1.08	1.24	0.35	22.37	1	1	1	1	1	1	2	2	1	1	1	1	1	2	3	2
110	0	2	7	120	25	17.36	7	1.17	5.03	1.25	29.4	1	2	1	1	1	1	2	2	1	1	1	1	1	2	2	1
111	0	2	7	160	26	14.16	7	1.25	1.16	1.36	28.99	1	2	2	1	1	1	2	2	1	1	1	1	1	2	2	2
112	0	1	10	115	22	16.64	10	1.52	1.05	0.96	20.5	1	2	2	1	1	1	2	2	1	1	1	1	1	2	2	2
114	0	2	9	115	25	16.9	9	2.03	0.69	0.56	10.27	1	2	2	1	1	1	2	2	1	1	1	1	1	2	2	2
115	0	2	7	130	24	14.2	7	1.91	0.58	0.39	10.23	1	1	2	1	1	1	2	2	1	1	1	1	1	2	2	2
117	0	2	8	126	21	15.43	8	2.39	1.92	1.25	16.94	1	1	1	2	1	1	2	2	1	1	1	1	1	2	2	1
118	0	2	9	135	30	16.46	9	0.25	1.74	1.36	16.6	1	2	1	2	1	1	2	2	1	1	1	1	1	2	2	2
119	0	2	7	135	28	15.36	7	0.7	1.7	2.08	9.58	1	2	1	2	1	2	2	2	2	1	1	2	1	1	2	2
120	0	2	7	140	25	14.96	7	0.58	2.09	0.56	16.16	1	2	1	2	1	2	2	2	2	1	1	2	1	1	2	2
121	0	2	6	120	26	18.06	6	0.74	2.43	1.26	13.97	1	1	1	2	1	2	2	2	2	1	1	2	1	1	2	2
122	0	2	8	120	22	15.28	8	0.5	1.36	1.34	7	1	1	2	2	1	2	2	2	2	1	1	2	1	1	2	2
123	0	2	9	160	23	16.98	9	0.58	1.28	1.87	10.02	1	1	2	2	1	2	2	2	2	1	1	2	1	1	3	2
124	0	2	7	115	25	16.9	7	0.46	5.18	1.89	20.03	1	2	2	1	1	2	2	2	2	1	1	2	1	1	2	1
125	0	2	6	130	24	14.2	6	0.94	1.19	2.22	23.39	1	2	2	1	1	2	2	2	2	1	1	2	1	1	2	2
126	0	2	8	115	26	17.66	8	1.01	1.08	0.08	13.97	1	2	2	1	1	2	2	2	2	1	1	2	1	1	2	2
127	0	2	9	130	21	14.63	9	0.85	1.99	0.17	13.92	1	1	1	1	1	2	2	1	2	1	1	2	1	1	2	2
128	0	2	7	110	30	14.79	7	0.71	0.71	0.44	15.01	1	2	1	1	1	2	2	1	2	1	1	2	1	1	2	2
129	0	2	7	126	28	17.64	7	0.58	0.6	0.23	22.04	1	1	1	1	1	2	2	1	2	2	1	2	1	1	2	2
130	0	2	6	135	25	15.92	6	0.67	0.71	0.84	21.63	1	1	1	1	1	1	2	2	1	1	2	1	1	2	3	2
132	0	2	9	140	22	15.22	9	1.02	1.16	0.64	15.7	1	2	1	1	1	1	2	2	1	1	2	1	1	2	2	2
133	0	2	7	120	23	15.97	7	1.07	1.05	0.86	8.93	1	2	2	1	1	1	2	2	1	1	2	1	1	2	2	2
134	0	2	6	120	25	17.36	6	1.53	1.93	0.38	8.9	1	2	2	1	1	2	2	1	2	2	1	2	1	1	2	2
135	0	2	8	160	24	16.38	8	1.41	0.69	0.26	9.68	1	1	2	1	1	1	2	2	1	1	2	1	1	2	2	2
137	0	2	7	130	21	14.63	7	1.25	0.69	0.84	14.44	1	1	2	1	1	1	2	2	1	1	2	1	1	2	3	2
138	0	2	7	115	30	18.68	7	1.52	1.92	0.91	8.34	1	2	1	1	1	1	2	2	1	1	2	1	1	2	2	1
139	0	2	6	130	28	16.57	6	1.57	1.74	1.39	14.06	1	2	1	1	1	2	2	1	2	2	1	2	1	1	2	2
140	0	2	8	110	25	16.66	8	2.03	1.7	0.38	12.15	1	2	1	2	1	1	2	2	1	1	2	1	1	2	2	2
142	0	1	7	135	22	14.27	7	2.58	2.43	0.9	8.72	1	2	1	2	1	1	2	2	1	1	2	1	1	2	2	2
143	0	2	10	135	23	14.82	10	2.39	1.36	0.25	17.43	1	1	1	2	1	1	2	2	1	1	2	1	2	2	2	2
144	0	2	6	140	25	14.96	6	0.25	1.28	0.65	20.35	1	1	2	2	1	2	2	1	2	2	1	2	1	1	3	2
145	0	2	8	120	24	16.67	8	0.7	5.18	0.35	12.15	1	1	2	2	1	1	2	2	1	1	2	1	2	2	2	1
147	0	1	6	160	21	14.2	6	0.74	1.08	1.36	13.05	1	2	2	1	1	1	2	2	1	1	2	1	2	2	2	2
148	0	2	9	115	30	14.88	9	0.5	1.99	0.96	19.17	1	2	2	1	1	1	2	2	1	1	2	1	2	2	2	2
149	0	2	9	130	28	16.57	9	0.58	0.71	1.28	18.82	1	1	1	1	1	2	2	1	2	2	1	2	1	1	2	2
150	0	2	10	115	25	16.9	10	0.46	0.6	0.56	11.43	1	1	1	1	1	1	2	2	1	1	2	1	2	2	2	2
152	0	2	8	110	22	17.18	8	1.01	5.03	0.95	10.02	2	2	1	1	1	1	2	2	1	1	2	1	2	2	2	1
153	0	2	7	126	23	14.49	7	0.85	1.16	1.25	20.03	1	2	1	1	1	1	2	2	1	1	2	1	2	2	2	2
154	0	1	6	135	25	15.92	6	0.71	1.05	1.36	23.39	1	2	1	1	1	2	2	1	2	2	1	2	1	1	2	2
155	0	2	9	135	24	15.37	9	0.58	1.93	2.08	13.97	1	1	2	1	1	1	2	2	1	1	2	1	2	2	2	2
157	0	2	10	120	21	14.58	10	1.69	0.58	1.26	15.01	1	1	2	1	1	1	2	2	1	1	2	1	2	2	2	2
158	0	2	6	120	30	15.83	6	1.52	0.69	1.34	22.04	1	1	2	1	1	1	2	2	1	1	2	1	2	2	3	2
159	0	2	8	160	28	16.14	8	0.63	1.92	1.87	21.63	1	1	2	1	1	2	2	1	2	2	1	2	1	1	2	1
160	0	1	7	115	25	15.9	7	0.27	1.74	1.89	13.14	1	2	1	1	1	1	2	2	1	1	2	1	2	2	2	2
162	0	2	9	115	22	16.64	9	0.21	2.09	0.08	8.93	1	2	1	1	1	1	2	2	1	1	2	1	2	2	2	2
163	0	2	9	130	23	15.81	9	0.93	2.43	0.17	8.9	1	1	1	2	1	1	2	2	1	1	2	1	2	2	2	2
164	0	2	10	110	25	14.66	10	1.04	1.36	0.44	9.68	1	1	1	2	1	2	2	1	2	2	1	2	1	1	2	2
165	0	2	6	126	24	15.12	6	0.79	1.28	0.23	14.74	1	1	1	2	1	1	2	2	1	1	2	1	2	2	3	2
167	0	2	7	135	21	14.72	7	0.39	1.19	0.91	8.34	1	2	2	2	1	1	2	2	1	1	2	1	2	2	2	2
168	0	2	6	140	30	15.31	6	0.52	1.08	0.64	14.06	1	2	2	2	1	1	2	2	1	1	2	1	2	2	2	2
169	0	2	9	120	28	16.44	9	0.64	1.99	0.86	12.15	1	1	2	2	1	2	2	1	2	2	1	2	1	1	2	2
170	0	2	9	120	25	17.36	9	1.06	0.71	0.38	6.09	1	2	2	1	1	1	2	2	1	1	2	1	2	2	2	2
172	0	2	6	115	22	16.64	6	1.83	0.71	0.64	14.96	1	1	1	1	1	1	2	2	1	1	2	1	2	2	3	2
173	0	2	8	130	23	15.81	8	1.05	1.35	0.84	23.58	1	1	1	1	1	1	2	2	1	1	2	1	2	2	2	1
174	0	2	7	115	25	15.9	7	1.69	1.26	0.91	26.47	1	2	1	1	1	2	2	1	2	2	1	2	1	1	2	2
175	0	2	6	130	24	14.2	6	1.52	1.96	1.39	18.36	1	2	1	1	1	1	2	2	1	1	2	1	2	2	2	2
177	0	2	9	126	21	15.43	9	0.27	4.26	0.84	19.25	1	1	1	1	1	1	2	2	1	1	2	1	2	2	2	2
178	0	2	10	135	30	16.46	10	0.39	1.35	0.9	25.31	1	1	1	1	1	1	2	2	1	1	2	1	2	2	2	2
179	0	2	6	135	28	15.36	6	0.21	1.05	0.54	24.96	1	1	1	1	1	2	2	1	2	2	1	2	1	1	3	2
180	0	2	8	140	25	14.96	8	0.93	2.36	0.36	17.65	1	2	1	1	1	1	2	2	1	1	2	1	2	2	2	1
182	0	2	6	120	22	15.28	6	0.79	3.1	0.98	17.63	1	2	2	1	1	1	2	2	1	1	2	1	2	2	2	2
183	0	2	9	160	30	15.72	9	0.58	3.58	1.05	11.87	1	2	2	1	1	1	2	2	1	1	2	1	2	2	2	2
184	0	2	9	115	32	14.2	9	0.39	0.96	1.25	14.36	1	2	1	1	1	2	2	1	2	2	1	2	1	1	2	2
185	0	2	9	130	29	17.16	9	0.52	1.36	0.36	12.64	1	2	1	1	1	1	2	2	1	1	2	1	2	2	2	2
187	0	2	7	130	28	16.57	7	1.06	1.65	0.58	17.63	1	2	1	2	1	1	2	2	1	1	2	1	2	2	3	3
6	1	2	6	130	29	15.44	6	9.54	15.69	3.92	50.36	1	2	2	1	1	1	1	2	2	2	2	1	2	2	2	3
7	1	2	8	150	38	15.19	9	5.12	17.65	2.56	32.14	2	2	2	1	1	1	1	2	2	2	2	2	1	2	2	3
8	1	2	9	145	28	15.44	10	6.54	18.36	2.25	29.23	1	2	2	1	1	1	1	2	2	2	2	2	1	2	3	3
10	1	2	8	135	35	15.5	9	3.54	16.98	1.56	49.36	1	2	2	1	1	1	1	2	1	2	2	1	1	2	2	1
11	1	2	9	143	45	16.99	10	5.26	15.28	1.25	38.23	1	1	2	1	2	1	1	2	2	2	2	2	2	2	3	1
12	1	2	7	140	32	14.83	8	3.96	19.98	2.96	39.12	1	2	2	1	1	1	1	2	2	1	2	2	1	2	1	1
14	1	2	6	130	36	15.6	6	5.36	24.36	2.79	29.35	1	2	2	1	1	1	1	2	1	2	2	1	1	2	3	1
15	1	2	8	119	29	16.27	9	6.14	18.63	2.82	28.03	2	1	2	1	1	1	1	2	1	2	2	2	1	2	2	3
16	1	2	9	126	38	17.24	10	7.41	12.36	3.32	26.45	1	2	2	1	1	1	1	2	1	1	2	2	1	2	2	3
18	1	2	6	135	27	15.11	6	7.24	14.35	4.12	29.15	1	1	1	2	1	1	1	2	1	2	2	1	1	2	2	1
19	1	2	8	140	35	14.16	9	7.98	12.98	2.69	32.56	1	1	2	1	1	1	1	2	1	2	2	2	1	2	2	1
20	1	2	9	120	45	17.55	10	10.49	13.45	2.36	22.86	1	2	2	1	1	1	1	2	1	1	1	2	1	2	3	1
22	1	2	7	119	39	15.53	8	7.19	16.67	1.64	30.83	1	2	2	2	1	1	1	2	1	2	2	1	1	2	1	1
23	1	2	6	126	36	15.98	6	4.79	18.2	1.31	41.43	1	1	1	1	1	1	1	2	1	2	2	2	1	2	3	1
24	1	2	8	135	29	16.21	9	3.89	18.48	3.11	45.32	1	1	1	1	1	1	1	2	1	1	1	2	2	2	2	2
26	1	2	7	140	28	15.59	8	4.36	15.06	2.43	26.31	1	2	1	1	1	1	1	2	1	2	2	1	2	2	3	2
27	1	2	6	120	27	15.05	6	3.89	16.94	2.46	35.32	1	2	1	2	1	1	1	2	1	2	2	2	2	2	2	1
28	1	2	8	140	35	14.16	9	5.9	17.63	2.96	44.42	1	2	2	2	1	1	1	2	1	1	1	2	2	2	2	1
30	1	2	7	140	32	16.63	8	5.41	16.3	3.76	35.21	1	2	2	2	1	1	1	2	1	2	2	1	2	2	1	1
31	1	2	7	120	39	15.58	8	5.07	14.67	2.33	33.53	1	1	2	2	1	1	1	2	1	2	2	2	2	2	1	1
32	1	2	6	120	36	15.3	6	5.24	19.18	2	26.42	1	1	2	2	1	1	1	2	1	1	1	2	2	2	1	1
34	1	2	9	126	38	16.24	10	8.49	23.39	1.28	23.81	1	2	2	2	1	1	1	2	1	2	2	1	2	2	2	2
35	1	2	7	135	28	14.66	8	3.63	17.88	0.95	20.84	1	2	1	2	1	1	1	2	1	2	2	2	2	2	1	2
36	1	2	6	135	27	14.31	6	5.19	11.87	2.75	69.25	1	2	1	2	1	1	1	2	1	1	1	2	2	2	2	1
38	1	2	9	120	45	17.55	10	1.89	13.78	2.66	46.37	1	1	1	1	1	1	1	2	1	2	2	1	2	2	3	1
39	1	2	7	135	32	16.06	8	3.79	12.46	2.69	53.21	1	1	1	2	1	1	1	2	1	2	2	2	2	2	1	1
40	1	1	10	140	39	16.2	11	2.36	12.91	3.16	27.36	1	2	1	2	1	1	1	1	1	1	1	2	2	2	1	1
42	1	1	9	160	29	17.63	10	3.9	17.65	3.92	45.47	1	2	2	1	1	1	1	1	1	2	2	1	2	2	2	2
43	1	2	9	143	38	15	10	5.58	19.18	2.56	35.46	1	1	2	1	1	1	1	1	1	2	2	2	2	2	2	2
44	1	1	9	126	28	16.14	10	5.76	19.46	2.25	36.26	1	2	2	1	1	1	1	1	1	1	1	2	2	2	3	2
46	1	2	8	135	35	15.5	9	9.34	16.04	1.56	27.47	1	1	1	2	1	1	1	1	1	2	2	2	2	2	2	1
47	1	2	9	140	45	16.26	10	4	17.92	1.25	26.28	1	1	1	2	1	1	1	1	1	2	2	2	2	2	3	1
48	1	2	7	120	32	16.52	8	5.71	18.61	2.96	24.86	1	2	1	2	1	1	1	1	1	1	1	2	2	2	1	1
50	1	2	6	140	36	14.67	6	2.08	17.28	2.79	27.29	1	2	2	2	1	1	1	1	1	1	1	2	2	2	3	1
52	1	2	9	160	27	16.85	10	1.05	20.16	3.32	62.36	1	1	2	1	1	1	1	1	1	1	1	2	1	2	2	2
54	0	2	8	130	25	14.79	8	0.25	2.48	0.25	18.36	1	2	1	1	1	1	1	2	2	1	2	1	1	2	1	1
55	0	2	9	115	24	15.15	9	0.36	3.69	0.65	12.36	1	2	1	1	1	1	1	2	2	1	2	1	1	2	1	2
56	0	2	7	120	26	15.06	7	0.19	4.59	0.35	14.96	1	2	1	1	1	1	1	2	2	1	2	1	1	2	1	2
57	0	2	7	110	21	17.36	7	0.86	5.32	1.25	23.58	1	1	1	1	1	1	1	2	2	1	2	1	1	2	1	2
58	0	2	6	126	30	15.9	6	0.96	6.18	1.36	26.47	1	2	1	1	1	1	1	2	2	1	2	1	1	2	1	2
59	0	2	8	135	28	15.36	8	0.73	7.26	0.96	18.36	1	1	1	1	1	1	1	2	2	1	2	1	1	2	2	2
60	0	2	9	135	25	15.92	9	0.54	9.87	1.28	18.32	1	1	1	1	1	1	1	2	2	1	2	1	1	2	3	2
61	0	2	7	140	26	15.47	7	0.36	8.15	0.56	19.25	1	1	1	1	2	1	1	2	2	1	2	1	1	2	2	1
62	0	2	6	120	22	15.28	6	0.48	1.96	0.39	25.31	1	2	1	1	1	1	1	2	2	1	2	1	1	2	2	2
63	0	2	8	160	23	15.98	8	0.59	1.85	0.95	24.96	1	2	2	1	1	1	1	2	2	1	2	1	1	2	2	2
64	0	2	9	115	25	15.9	9	0.98	1.36	1.25	17.65	1	2	2	1	1	1	1	2	2	1	2	1	1	2	2	2
65	0	2	7	130	24	14.2	7	1.05	2.36	1.36	19.44	1	1	2	1	1	1	1	2	2	2	2	1	1	2	2	2
66	0	2	7	115	26	15.66	7	1.69	5.36	2.08	17.63	1	1	2	1	1	1	1	2	2	1	2	2	1	2	2	2
67	0	2	6	130	21	14.63	6	1.52	5.12	0.56	11.87	1	1	1	1	1	1	1	2	2	1	2	2	1	2	3	2
68	0	2	8	110	30	14.79	8	0.63	2.36	1.26	14.36	1	2	1	1	1	1	1	2	2	1	2	2	1	2	2	1
69	0	2	9	126	28	15.64	9	0.27	3.65	1.34	22.64	1	2	1	1	1	1	1	2	2	1	2	2	1	2	2	2
70	0	2	7	135	25	15.92	7	0.39	4.25	1.65	25.41	1	2	1	1	1	1	1	2	2	1	2	2	1	2	2	2
71	0	2	6	135	26	14.27	6	0.21	1.73	4.12	17.63	1	1	1	2	1	2	1	2	2	1	2	2	1	2	2	2
72	0	2	8	140	22	15.22	8	0.93	2.7	2.69	17.59	1	2	1	2	1	2	1	2	2	1	2	2	1	2	2	2
73	0	2	9	120	23	15.97	9	1.04	4.02	2.36	18.48	1	1	1	2	1	2	1	2	2	1	2	2	1	2	2	2
74	0	2	7	120	25	17.36	7	0.79	5	3.28	24.3	1	1	2	2	1	1	1	2	2	1	2	1	1	2	3	2
75	0	2	7	160	24	15.38	7	0.58	5.8	1.64	23.96	1	1	2	2	1	1	1	2	2	1	2	1	1	2	2	1
76	0	2	6	115	26	15.66	6	0.39	6.74	1.31	16.94	1	2	2	2	1	1	1	2	2	1	2	1	1	2	2	2
77	0	2	8	130	21	14.63	8	0.52	7.91	3.11	20.25	1	2	2	2	1	1	1	2	2	1	2	1	1	2	2	2
78	0	2	9	115	30	14.68	9	0.64	10.76	2.28	18.36	1	2	1	1	1	1	1	2	2	1	2	1	1	2	2	2
79	0	2	7	130	28	16.57	7	1.06	8.88	2.43	12.36	1	1	1	1	1	1	1	2	2	1	2	1	1	2	2	2
80	0	2	6	110	25	15.66	6	1.13	2.14	2.46	14.96	1	1	1	1	1	1	1	2	2	2	2	1	1	2	2	2
81	0	2	8	126	26	16.38	8	1.83	2.02	2.96	23.58	1	1	1	1	1	1	1	2	2	2	2	1	1	2	3	2
82	0	2	9	135	22	14.27	9	1.64	1.48	3.47	26.47	1	2	1	1	1	1	1	2	2	1	2	1	1	2	2	1
83	0	2	7	135	23	14.82	7	1.88	2.57	3.76	18.36	1	2	1	1	1	1	1	2	2	1	2	1	1	2	2	2
84	0	2	7	140	25	14.96	7	1.52	5.85	2.33	18.32	1	2	1	1	1	1	1	2	2	1	2	1	1	2	2	2
85	0	2	6	120	24	16.67	6	1.64	5.58	2	19.25	1	1	2	1	1	1	1	2	2	1	2	1	1	2	2	2
113	0	2	8	130	23	15.81	8	1.57	1.93	1.28	18.05	1	1	2	1	1	1	1	2	2	2	1	1	1	1	2	2
116	0	2	6	110	26	15.69	6	2.58	0.69	0.95	11.12	1	1	1	1	1	1	1	2	2	2	1	1	1	1	3	2
131	0	2	8	135	26	14.27	8	0.75	5.03	0.91	13.14	1	1	1	1	1	1	1	2	2	2	2	1	1	1	2	1
136	0	2	9	115	26	17.66	9	1.17	0.58	0.64	14.74	1	1	2	1	1	1	1	2	2	2	2	1	1	2	2	2
141	0	2	9	126	26	16.38	9	1.91	2.09	0.84	6.09	1	1	1	2	1	1	1	2	2	2	2	1	1	1	2	2
146	0	2	7	120	26	18.06	7	0.58	1.19	1.25	12.11	1	2	2	2	1	1	1	2	2	2	2	1	1	1	2	2
151	0	2	6	130	26	15.38	6	0.94	0.71	0.39	7	1	1	1	1	1	1	1	2	2	2	2	1	1	1	3	2
156	0	2	9	140	26	15.47	9	1.05	0.69	0.56	13.92	2	2	2	1	1	1	1	2	2	2	2	1	1	2	2	2
161	0	2	6	130	26	15.38	6	0.39	1.7	2.22	15.7	1	2	1	1	1	1	1	2	2	2	2	1	1	2	2	2
166	0	2	8	135	26	14.27	8	0.58	5.18	0.84	14.44	1	2	2	2	1	1	1	2	2	2	2	1	1	2	2	1
171	0	2	10	160	26	15.16	10	1.13	0.6	0.26	8.72	1	1	1	1	1	1	1	2	2	2	2	1	1	2	2	2
176	0	2	9	110	26	15.49	9	0.63	2.03	0.38	18.32	1	2	1	1	1	1	1	2	2	2	2	1	1	2	2	2
181	0	2	7	120	26	16.06	7	1.04	2.45	0.54	19.44	1	2	1	1	1	1	1	2	2	2	2	1	1	2	2	2
186	0	2	8	115	28	14.17	8	0.64	1.95	0.19	15.41	1	1	2	2	1	1	1	2	2	2	2	1	1	2	3	3

## Sheet: Sheet2
Group	Gender	Family history of CPP	Residence	Only child	Left-behind children	Using adult skin careproducts	Watching love cartoon	Time for electronic devices	Sleep duration	Out door exercise duration	Sweet tooth	High protein foods lover	Fried foods lover	Carbonated beverage intake	Milk intake	Career of mother	Career of father
1=central precocious puberty group	1=Male	1=No	1=Country	1=No	1=No	1=No	1=No	1=≤7 h/w	1=≤9 h/d	1=≤2 h/d	1=No	1=No	1=No	1=≤500 ml/w	1=≤2000 ml/w	1=Self-employed household	1=Self-employed household
0=non-precocious puberty group	2=Female	2=Yes	2=City	2=Yes	2=Yes	2=Yes	2=Yes	2=＞7 h/w	2=＞9 h/d	2=＞2 h/d	2=Yes	2=Yes	2=Yes	2=＞500 ml/w	2=＞2 000 ml/w	2=Public institution worker	2=Public institution worker
																3=Other	3=Other
